# Supplementary material
Source: MDPI journal article supplement (https://www.mdpi.com/2073-4395/11/5/919)

subcluster\_10\_log2\_medianCentered\_fpkmmatrix, 4938 tr subcluster\_11\_log2\_medianCentered\_fpkmmatrix, 2221 tr

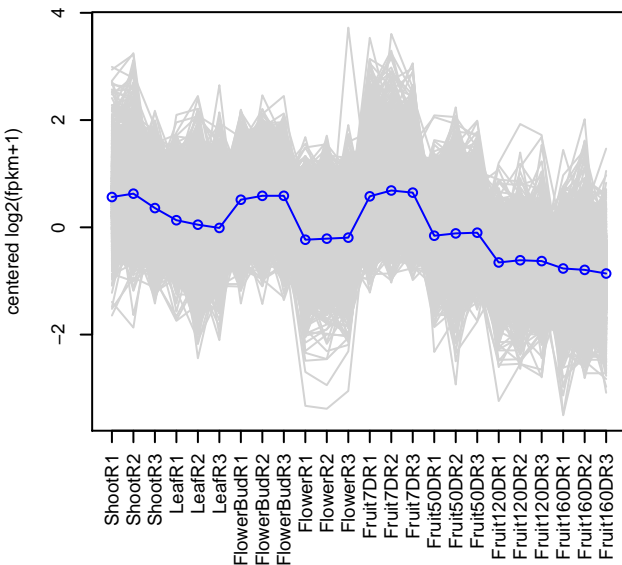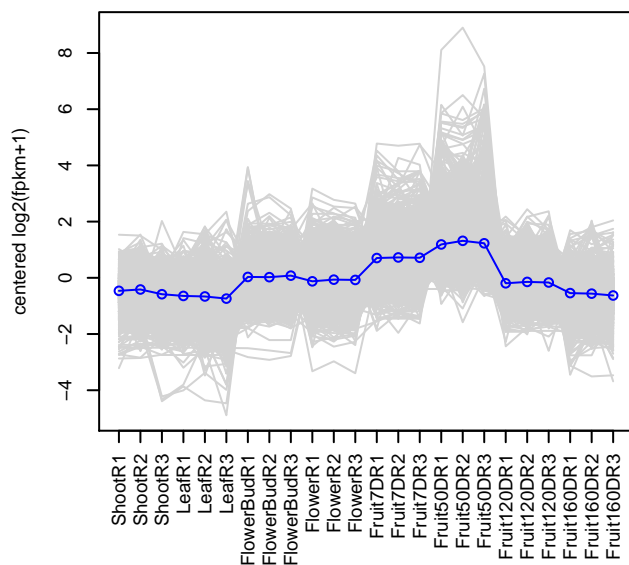

subcluster\_12\_log2\_medianCentered\_fpkmmatrix, 4528 tr subcluster\_13\_log2\_medianCentered\_fpkmmatrix, 6889 tr

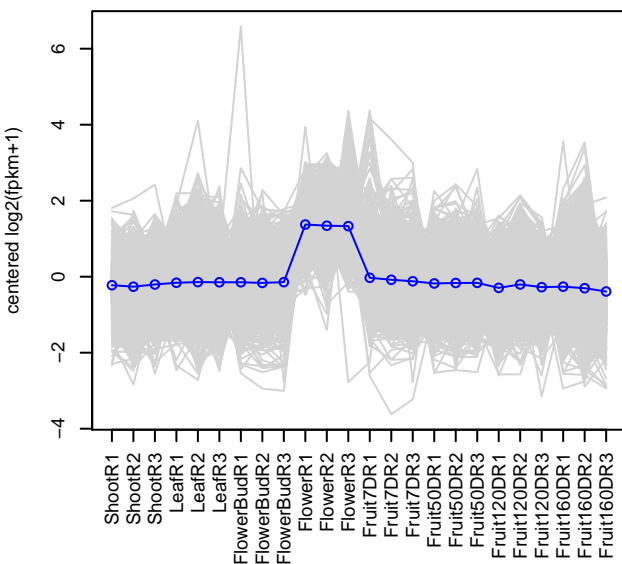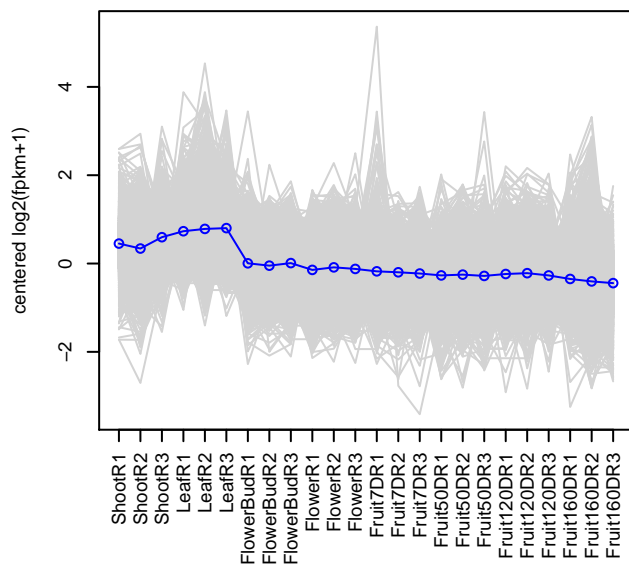

subcluster\_14\_log2\_medianCentered\_fpkm.matrix, 2205 tr subcluster\_15\_log2\_medianCentered\_fpkm.matrix, 3572 tr

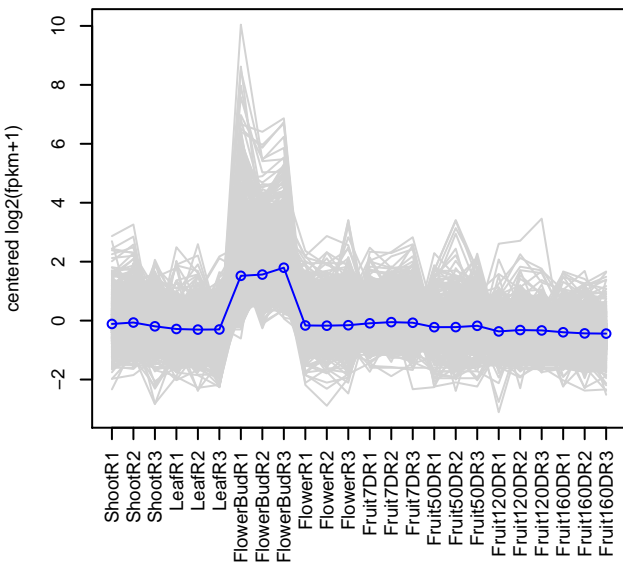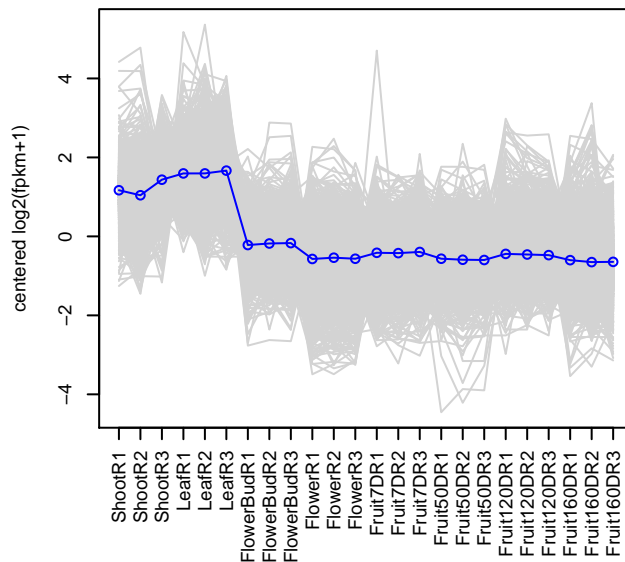

subcluster\_1\_log2\_medianCentered\_fpkm.matrix, 897 tra subcluster\_2\_log2\_medianCentered\_fpkm.matrix, 1279 tra

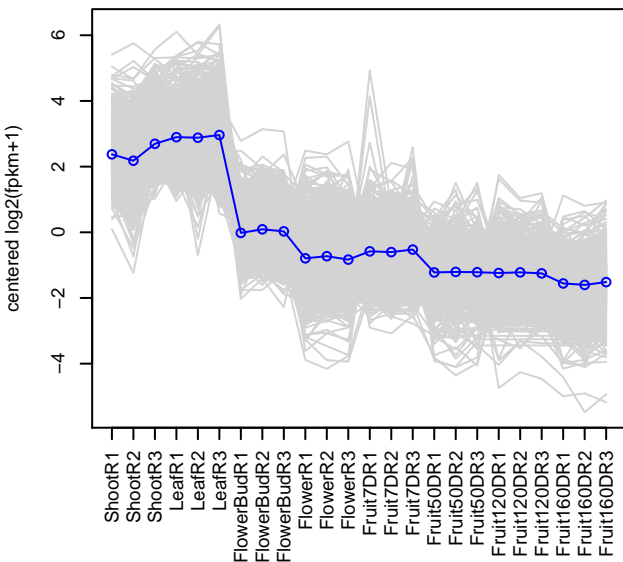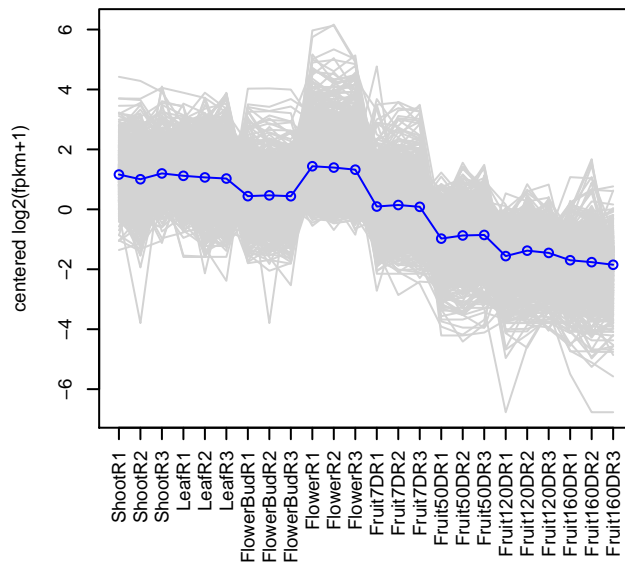

subcluster\_3\_log2\_medianCentered\_fpkms.matrix, 1273 tr subcluster\_4\_log2\_medianCentered\_fpkms.matrix, 6225 tr

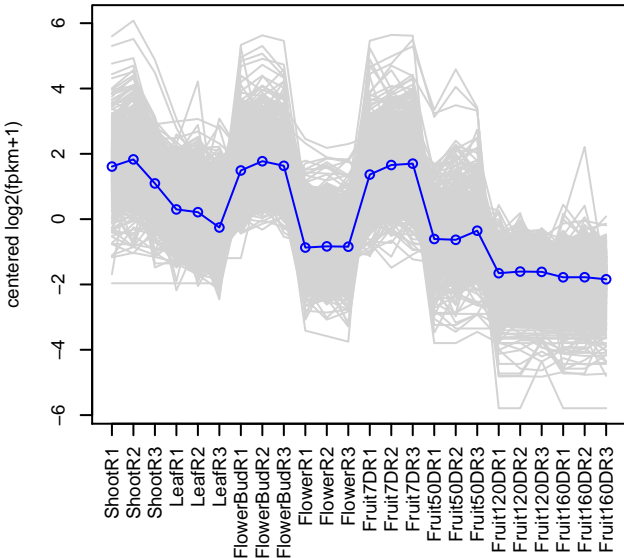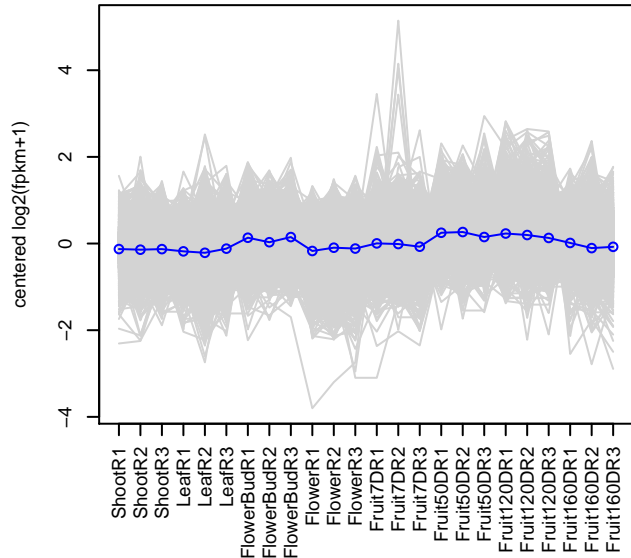

subcluster\_5\_log2\_medianCentered\_fpkms.matrix, 1123 tr subcluster\_6\_log2\_medianCentered\_fpkms.matrix, 650 tr

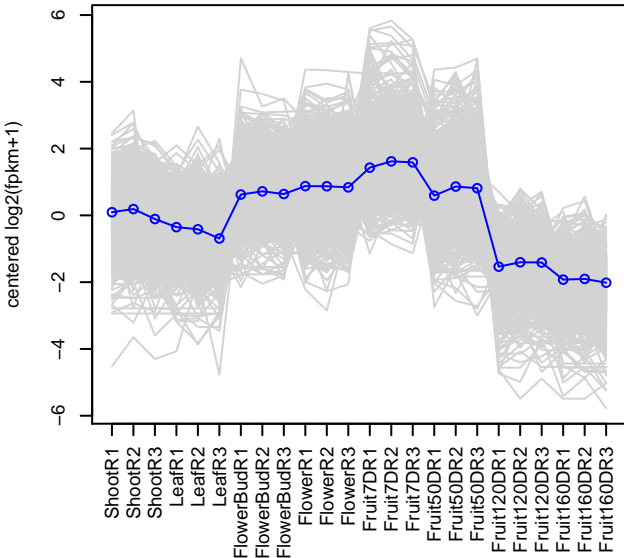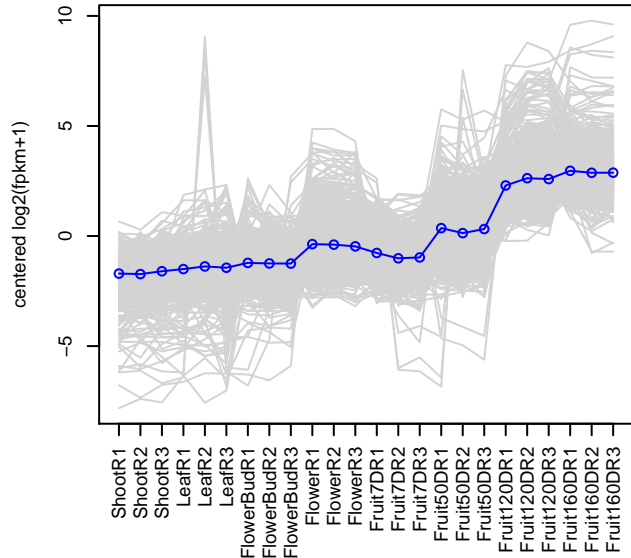

subcluster\_7\_log2\_medianCentered\_fpkm.matrix, 3281 tr subcluster\_8\_log2\_medianCentered\_fpkm.matrix, 819 tr

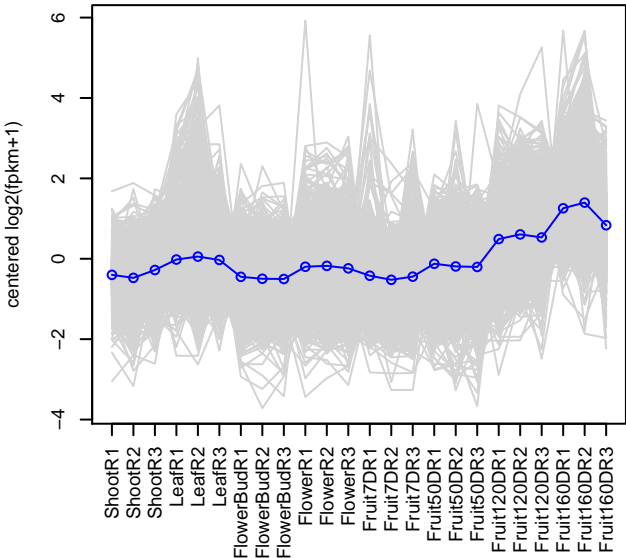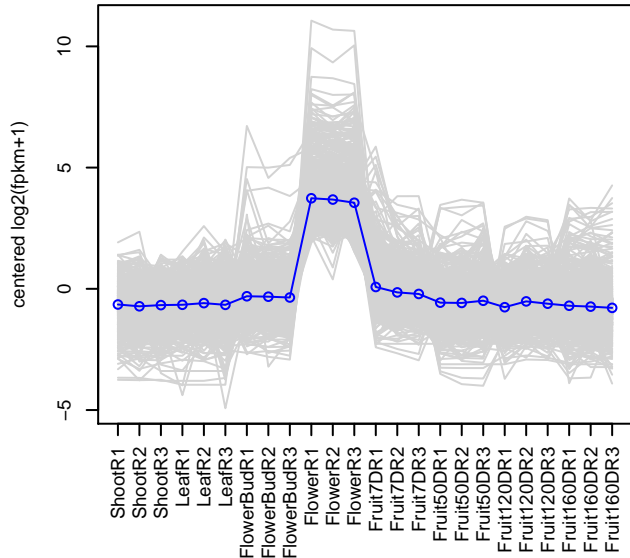

subcluster\_9\_log2\_medianCentered\_fpkm.matrix, 3081 tr

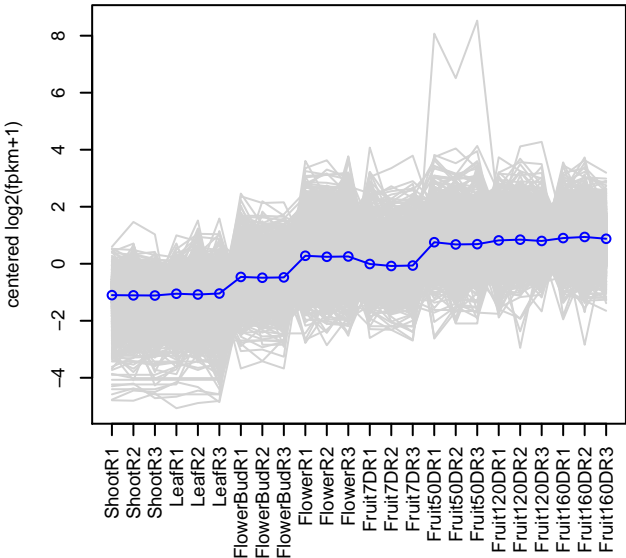

Supplement: s1 [file s1]
